# Supplementary material
Source: Royal Society of Chemistry journal article supplement (doi:10.1039/d5ta09437b)
Supplement: d5ta09437b1.pdf [file d5ta09437b1.pdf]

## Supporting Information

### **Pr<sub>6</sub>O<sub>11</sub>-driven electron modulation via d-f orbital hybridization for alkaline seawater electrolysis**

Nana Chen,<sup>a,b</sup> Bari Wulan,<sup>b\*</sup> Weipeng Zhang,<sup>b</sup> Xinping Xie,<sup>b</sup> Yuying Zhao,<sup>b</sup> Haibin

Guan,<sup>b</sup> Dongxing Tan,<sup>c</sup> Lei Chen,<sup>b</sup> Baofeng Zhao,<sup>b</sup> Weihong Zhou<sup>a\*</sup>

<sup>a</sup> *School of Civil Engineering, University of Science and Technology Liaoning, Anshan 114051 China*

<sup>b</sup> *Energy Research Institute, Shandong Key Laboratory of Biomass Efficient Conversion and Utilization, Qilu University of Technology (Shandong Academy of Sciences), Jinan 250014 China*

<sup>c</sup> *Shandong Key Laboratory of Catalytic Conversion and Clean Energy, School of Chemistry and Chemical Engineering, Qufu Normal University, Qufu 273165 China*

\*Corresponding authors: bariwulan@qlu.edu.cn (B. Wulan), zwh\_0190@sina.cn (W. Zhou)

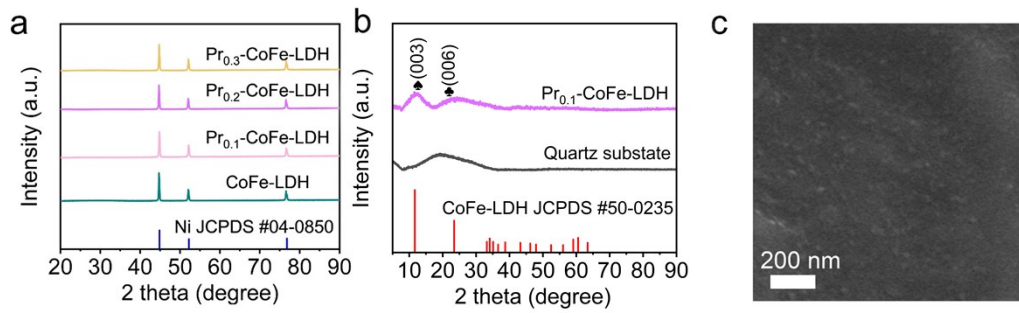

**Fig. S1.** XRD patterns of Pr<sub>x</sub>-CoFe-LDH deposited on the surface of (a) nickel mesh and (b) blank quartz. (c) SEM image of CoFe-LDH deposited on the surface of Ni mesh.

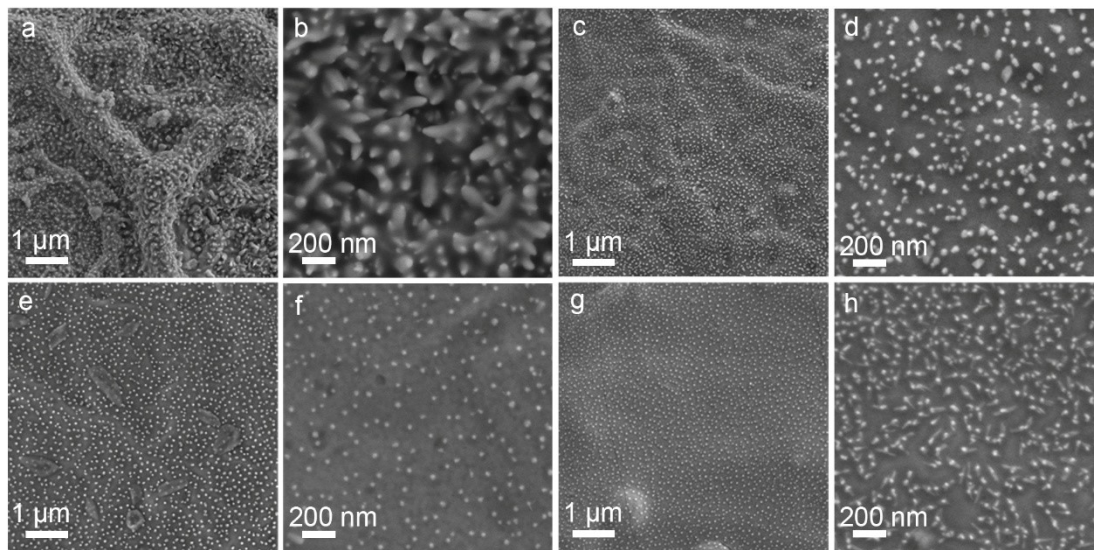

**Fig. S2.** SEM images of (a, b) CoP/Fe<sub>2</sub>P, (c, d) Pr<sub>0.1</sub>-CoP/Fe<sub>2</sub>P, (e, f) Pr<sub>0.2</sub>-CoP/Fe<sub>2</sub>P, and (g, h) Pr<sub>0.3</sub>-CoP/Fe<sub>2</sub>P.

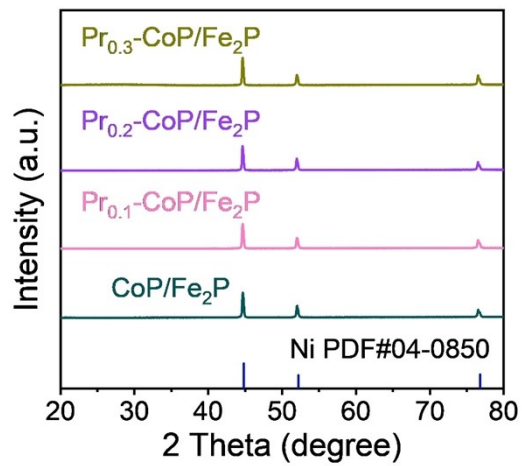

**Fig. S3.** XRD patterns of the as-prepared  $\text{Pr}_x\text{-CoFe-LDH}$  electrodes after the phosphidation treatment.

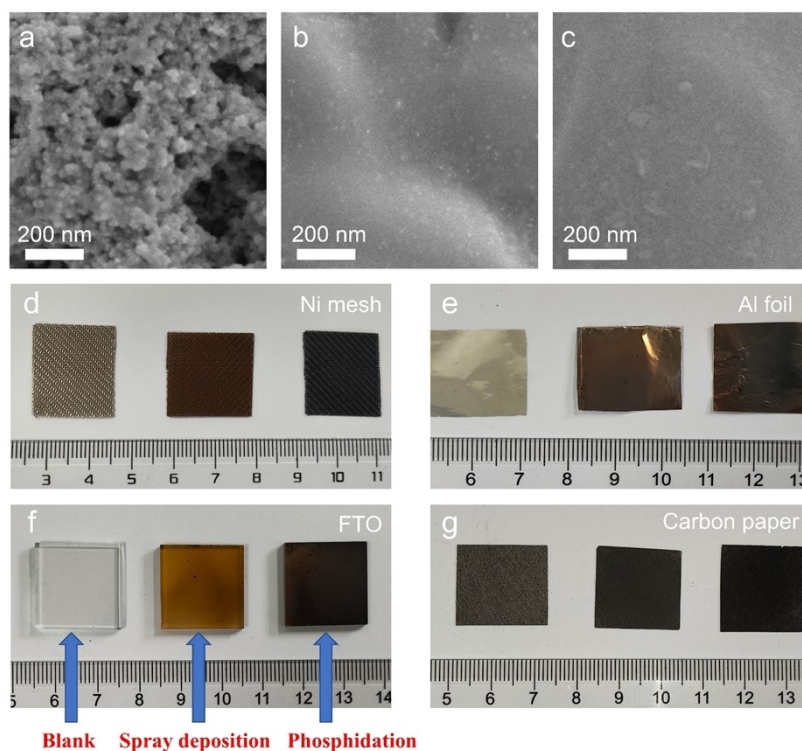

**Fig. S4.** SEM images of spray-deposited CoFe-LDH on (a) carbon paper, (b) Al foil, and (c) FTO. (d-g) Photographs of  $\text{Pr}_x\text{-CoP/Fe}_2\text{P}$  grown on different substrates via spray deposition followed by phosphidation.

Specifically, uniformly distributed nanoparticles are observed on carbon paper after identical spray deposition, whereas dense and uniform coatings are formed on Al foil and FTO. The substrate-dependent morphologies differ from those on Ni mesh, which may be attributed to different interactions between the metal salt species and the substrate during spray deposition, leading to distinct nucleation and growth behaviors.

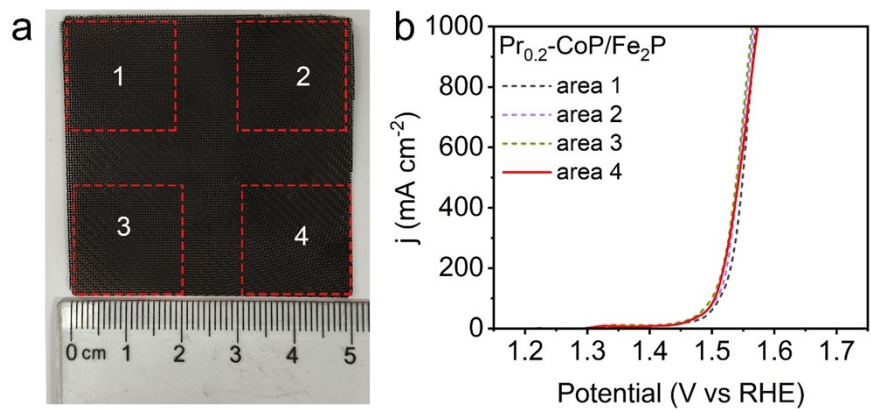

**Fig. S5.** (a) Photograph of the as-prepared  $\text{Pr}_{0.2}\text{-CoP/Fe}_2\text{P}$  electrode ( $5 \times 5 \text{ cm}^2$ ). (b) Polarization curves collected from selected regions of the electrode.

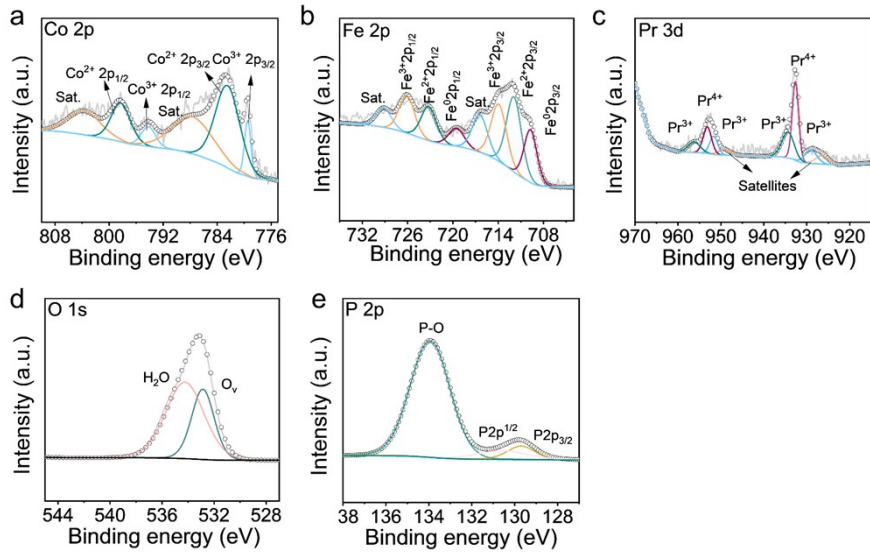

**Fig. S6.** High-resolution XPS spectra of (a) Co 2p, (b) Fe 2p, (c) Pr 3d, (d) O 1s, and (e) P 2p at  $\text{Pr}_{0.1}\text{-CoP/Fe}_2\text{P}$  electrode.

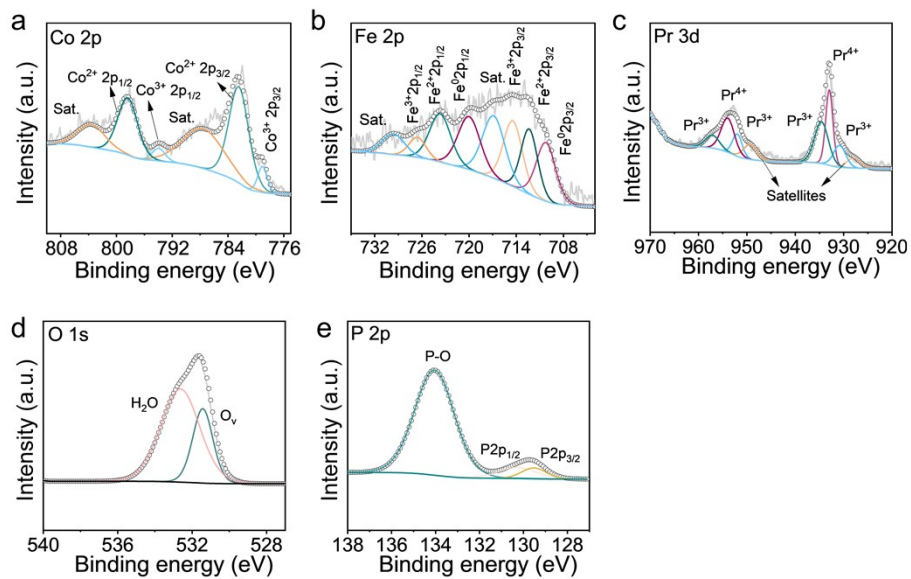

**Fig. S7.** High-resolution XPS spectra of (a) Co 2p, (b) Fe 2p, (c) Pr 3d, (d) O 1s, and (e) P 2p at  $\text{Pr}_{0.3}\text{-CoP/Fe}_2\text{P}$  electrode.

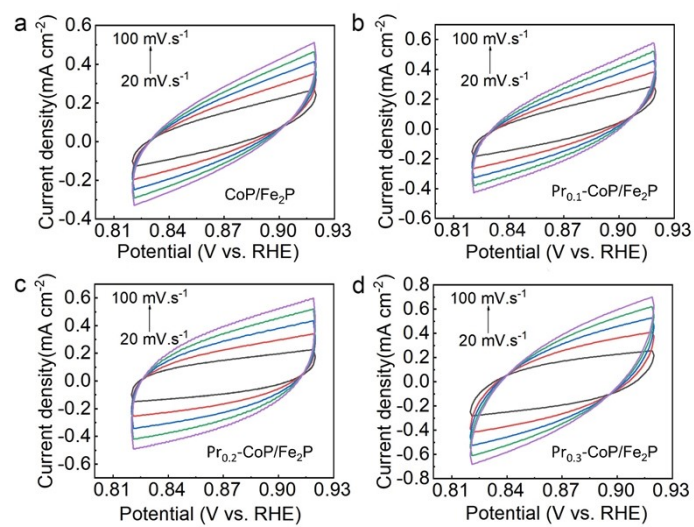

**Fig. S8.** CV curves for (a) CoP/Fe<sub>2</sub>P, (b) Pr<sub>0.1</sub>-CoP/Fe<sub>2</sub>P, (c) Pr<sub>0.2</sub>-CoP/Fe<sub>2</sub>P and (d) Pr<sub>0.3</sub>-CoP/Fe<sub>2</sub>P.

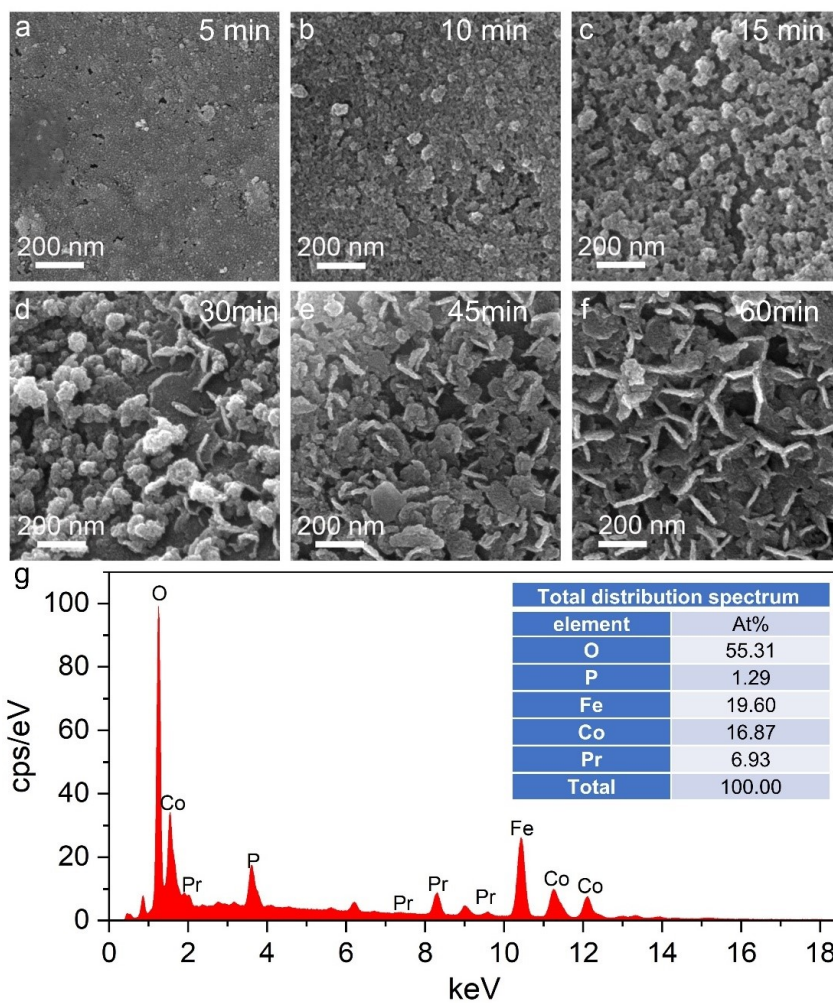

**Fig. S9.** SEM images of  $\text{Pr}_{0.2}\text{-CoP/Fe}_2\text{P}$  during OER process at  $200 \text{ mA cm}^{-2}$  for (a) 5 min, (b) 10 min, (c) 15 min, (d) 30 min, (e) 45 min, and (f) 60 min. (g) The EDS spectrum of  $\text{Pr}_{0.2}\text{-Co}_2\text{P/FeP}$  after OER.

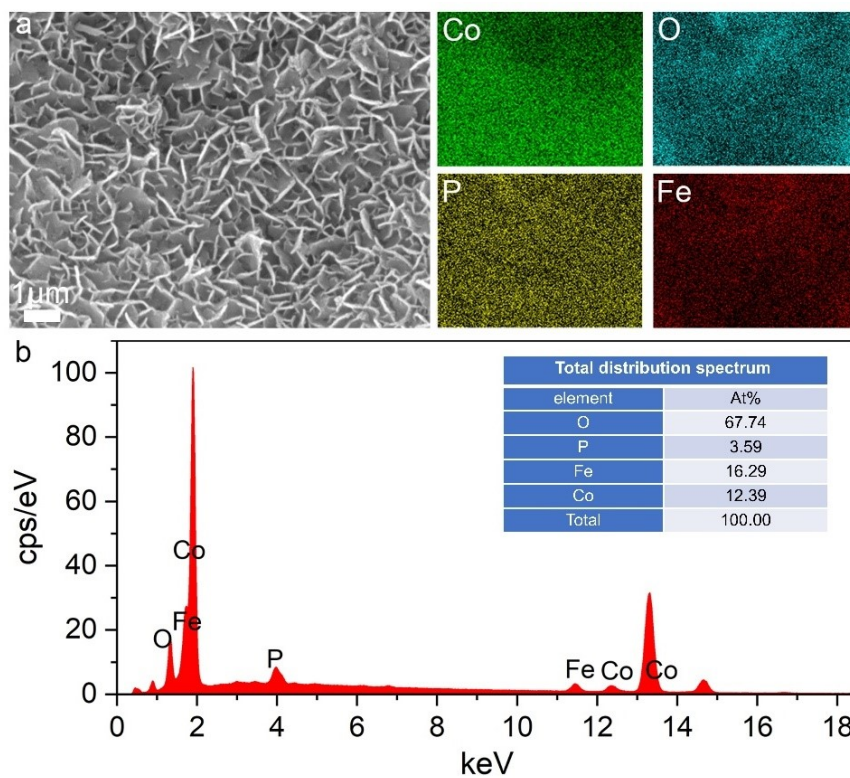

**Fig. S10.** (a) SEM image and (b) the corresponding EDS spectrum of CoP/Fe<sub>2</sub>P after OER test.

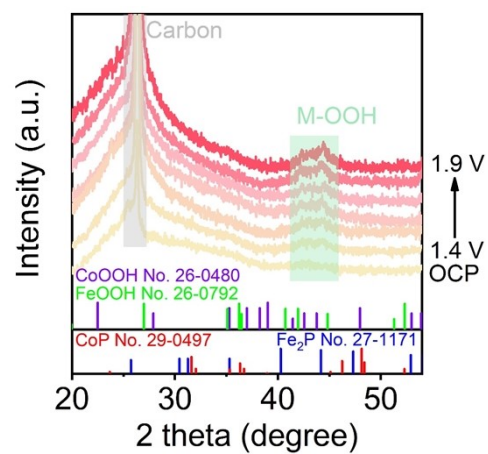

**Fig. S11.** Semi in situ XRD patterns of  $\text{Pr}_{0.2}\text{-CoP/Fe}_2\text{P}$  during the OER process.

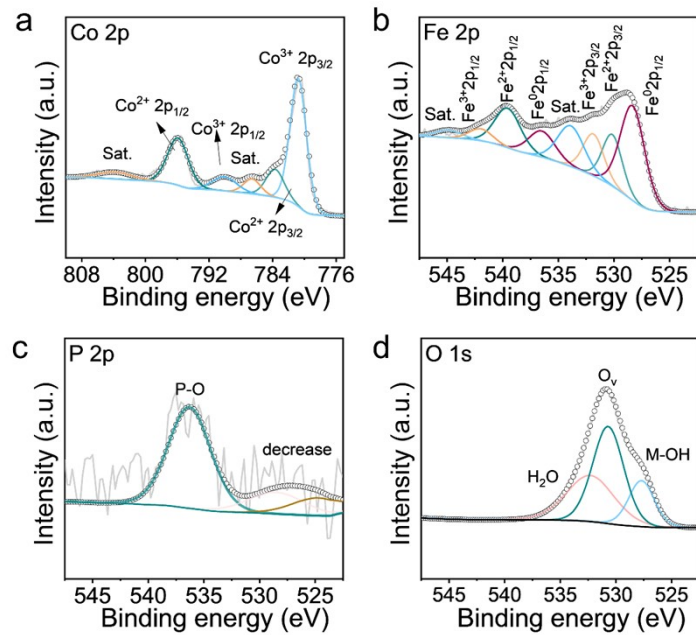

**Fig. S12.** High-resolution (a) Co 2p, (b) Fe 2p, (c) P 2p, and (d) O 1s XPS spectra of CoP/Fe<sub>2</sub>P after OER.

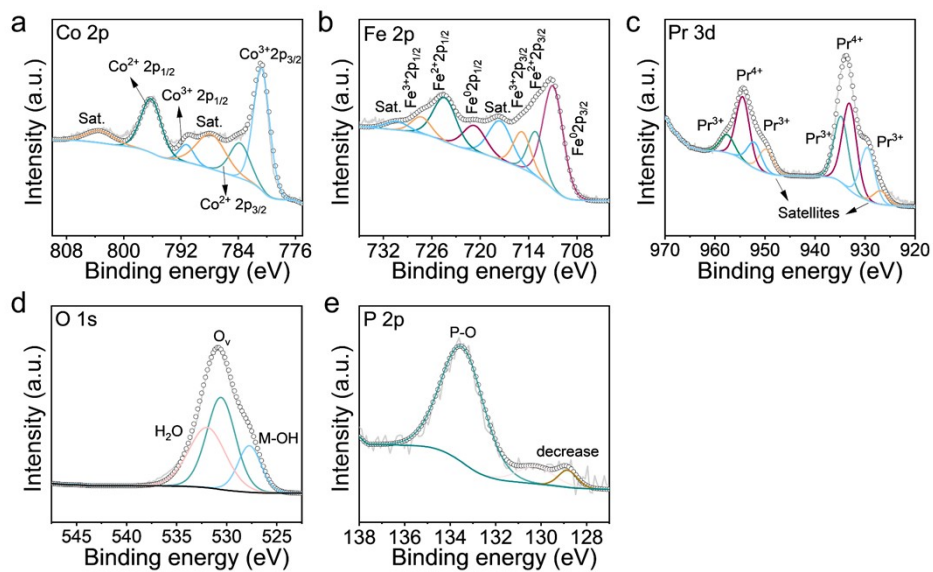

**Fig. S13.** High-resolution (a) Co 2p, (b) Fe 2p, (c) Pr 3d, (d) O 1s, and (e) P 2p XPS spectra of  $\text{Pr}_{0.1}\text{-CoP/Fe}_2\text{P}$  after OER.

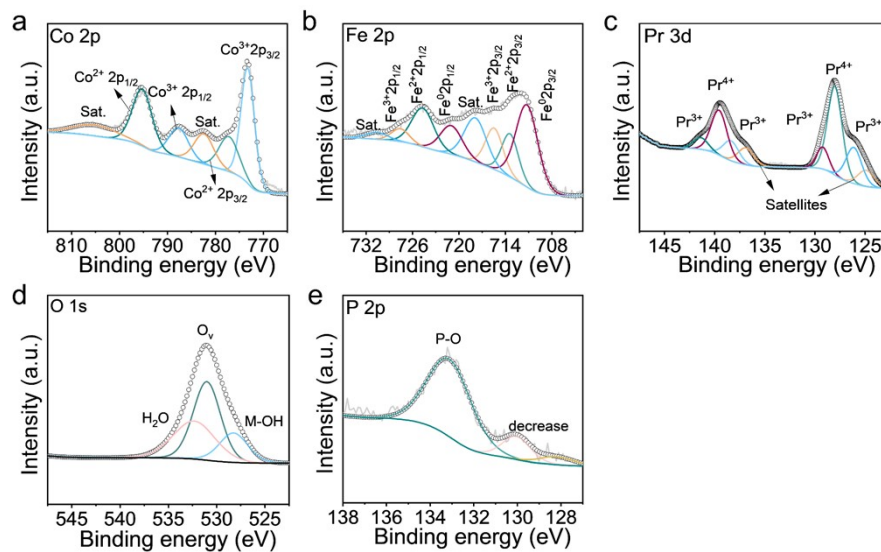

**Fig. S14.** High-resolution (a) Co 2p, (b) Fe 2p, (c) Pr 3d, (d) O 1s, and (e) P 2p XPS spectra of  $\text{Pr}_{0.3}\text{-CoP/Fe}_2\text{P}$  after OER.

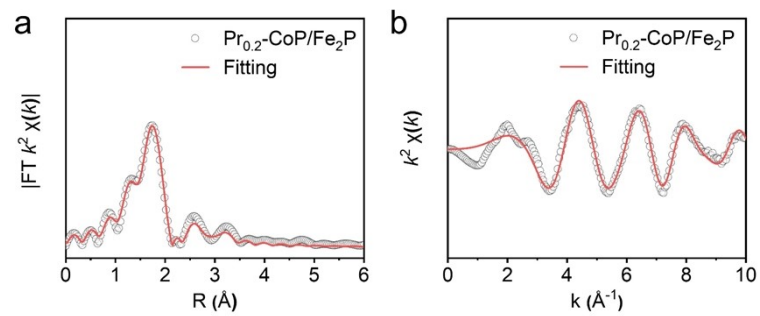

**Fig. S15.** The Fe K-edge EXAFS (a) R space and (b) k space fitting curves for  $\text{Pr}_{0.2}\text{-CoP/Fe}_2\text{P}$  after OER.

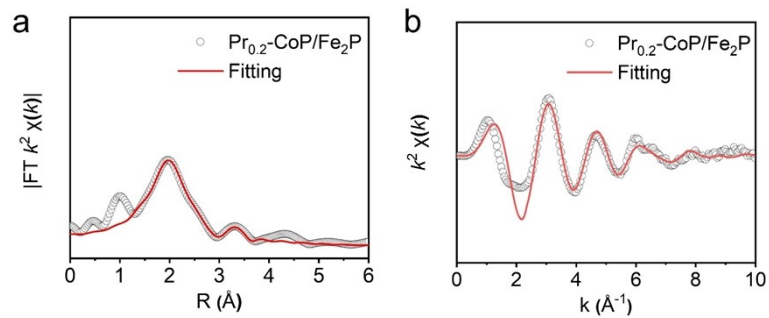

**Fig. S16.** The Pr L<sub>3</sub>-edge EXAFS (a) R space and (b) k space fitting curves for Pr<sub>0.2</sub>-CoP/Fe<sub>2</sub>P after OER.

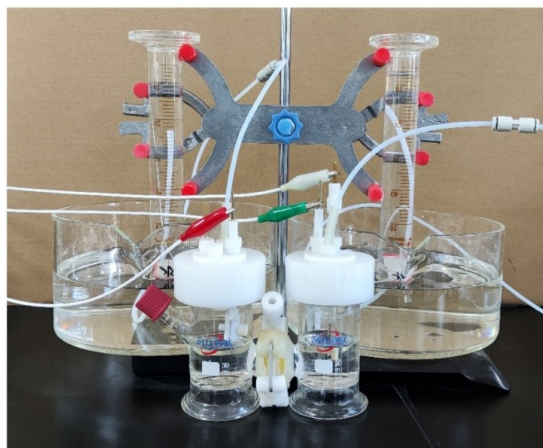

**Fig. S17.** Photograph of the apparatus for testing gas volumes generated by a drainage method.

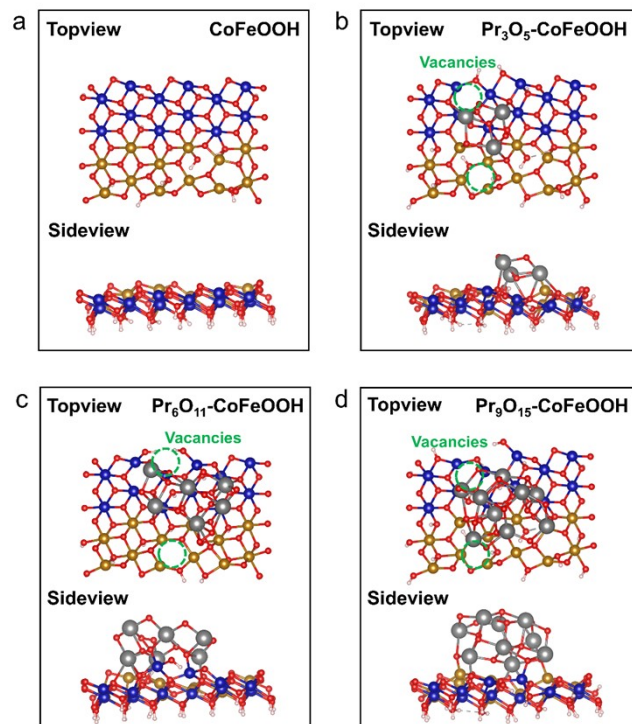

**Fig. S18.** The optimized structure of (a) CoFeOOH, (b) Pr<sub>3</sub>O<sub>5</sub>-CoFeOOH, (c) Pr<sub>6</sub>O<sub>11</sub>-CoFeOOH, and (d) Pr<sub>9</sub>O<sub>15</sub>-CoFeOOH.

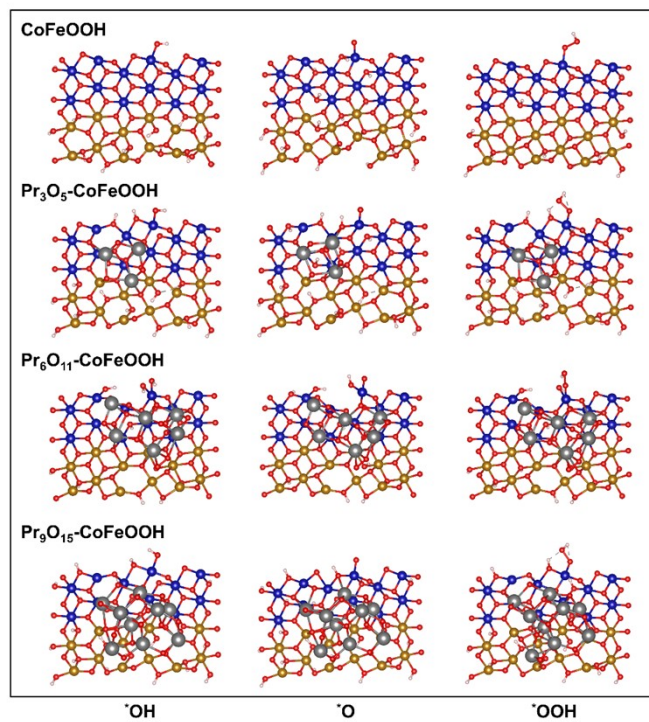

**Fig. S19.** The optimized OER configuration of reaction intermediates on different structures.

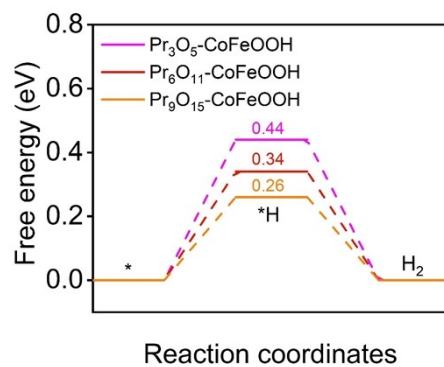

**Fig. S20.** Calculated Gibbs free energy profiles for the HER on different structures.

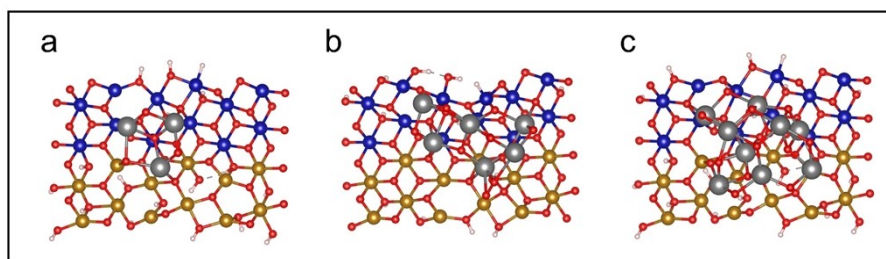

**Fig. S21.** The optimized configuration of \*H on (a)  $\text{Pr}_3\text{O}_5\text{-CoFeOOH}$ , (b)  $\text{Pr}_6\text{O}_{11}\text{-CoFeOOH}$ , and (c)  $\text{Pr}_9\text{O}_{15}\text{-CoFeOOH}$ .

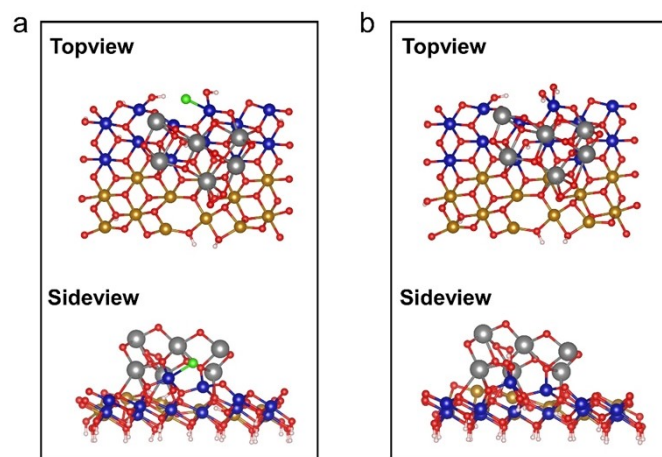

**Fig. S22.** The optimized configuration of (a) Cl<sup>-</sup> and (b) OH<sup>-</sup> adsorbed on the surface of Pr<sub>6</sub>O<sub>11</sub>-CoFeOOH.

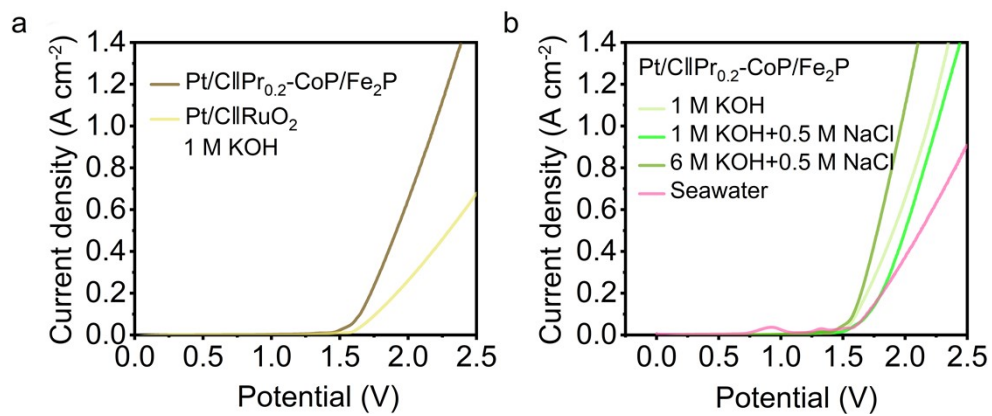

**Fig. S23.** (a) Polarization curves of AEMWE with different catalysts in 1 M KOH at room temperature. (b) Polarization curves of AEMWE using Pr<sub>0.2</sub>-CoP/Fe<sub>2</sub>P as the anode and Pt/C as the cathode in different electrolytes at 60°C.

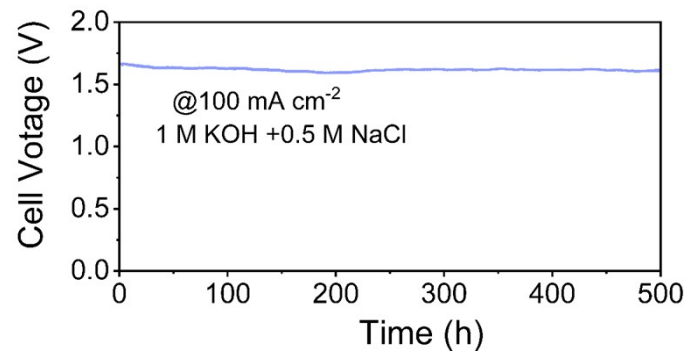

**Fig. S24.** Stability test of AEMWE with Pt/C || Pr<sub>0.2</sub>-CoP/Fe<sub>2</sub>P in 1 M KOH + 0.5 M NaCl at room temperature.

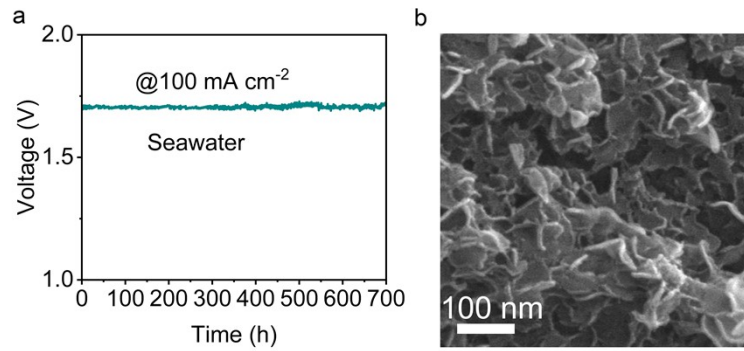

**Fig. S25.** (a) Chronopotentiometric durability of Pr<sub>0.2</sub>-CoP/Fe<sub>2</sub>P in natural seawater over 300 h. (b) SEM image of Pr<sub>0.2</sub>-CoP/Fe<sub>2</sub>P after stability test.

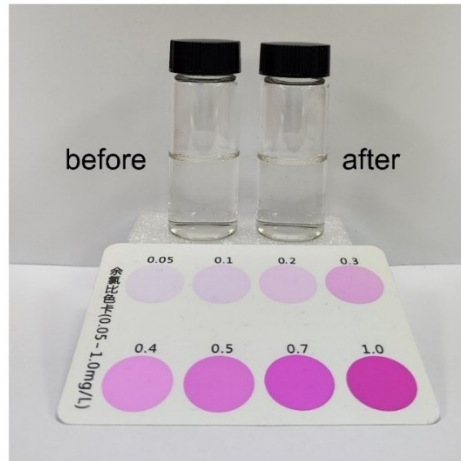

**Fig. S26.** Result of colorimetric reagent testing for the presence of hypochlorite in the 1 M KOH + 0.5 M NaCl electrolyte after stability testing of Pr<sub>0.2</sub>-CoP/Fe<sub>2</sub>P electrode at 100 mA cm<sup>-2</sup> for 500 h.

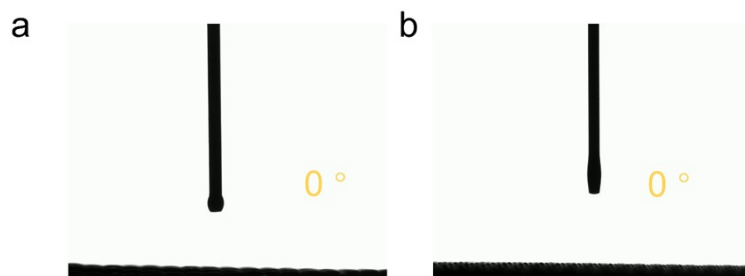

**Fig. S27.** Static water contact angle of (a) CoP/Fe<sub>2</sub>P and (b) Pr<sub>0.2</sub>-CoP/Fe<sub>2</sub>P electrode in 1 M KOH.

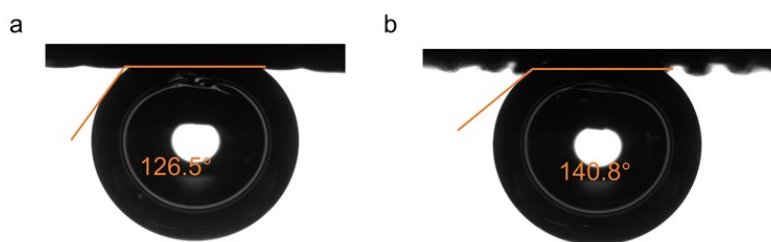

**Fig. S28.** Bubble contact angles in 1 M KOH for (a) CoP/Fe<sub>2</sub>P and (b) Pr<sub>0.2</sub>-CoP/Fe<sub>2</sub>P.

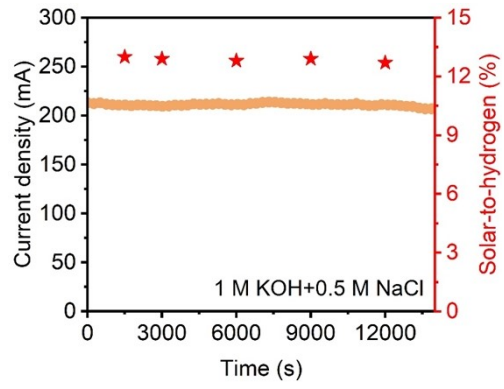

**Fig. S29** Photovoltaic-driven stability test and the corresponding STH conversion efficiency.

**Table S1.** Overpotential comparison of recently reported non-noble-metal OER electrocatalysts.

| Samples                                                       | Overpotential<br>(mV, at 100 mA cm <sup>-2</sup> ) | Electrolyte | Ref.      |
|---------------------------------------------------------------|----------------------------------------------------|-------------|-----------|
| Pr <sub>0.2</sub> -CoP/Fe <sub>2</sub> P                      | 223                                                | 1 M KOH     | This work |
| NiCe <sub>0.05</sub> /Fe@NM                                   | 257                                                | 1 M KOH     | 1         |
| MIM@Fe <sub>0.10</sub> -CoNi CH/NF                            | ~270                                               | 1 M KOH     | 2         |
| NiFe-LDH/FF                                                   | 220                                                | 1 M KOH     | 3         |
| F,Fe-CoO                                                      | ~230                                               | 1 M KOH     | 4         |
| R-CoFe/Ce/NF                                                  | ~299                                               | 1 M KOH     | 5         |
| Mo-Ni <sub>2</sub> P/Fe <sub>x</sub> P-V/NFF                  | 246                                                | 1 M KOH     | 6         |
| Mo-Co <sub>9</sub> S <sub>8</sub> @CC-2                       | 279                                                | 1 M KOH     | 7         |
| NiFe-LDH/Ni <sub>2</sub> S <sub>2</sub>                       | ~245                                               | 1 M KOH     | 8         |
| S-NiFeZn LDH/NF                                               | 235                                                | 1 M KOH     | 9         |
| P-NiCuFe <sub>0.06</sub> -LDH                                 | 240                                                | 1 M KOH     | 10        |
| Fe <sub>2.5</sub> Co <sub>2.5</sub> Ni <sub>10</sub> OyHz@NFF | 229                                                | 1 M KOH     | 11        |
| Mo-FeNiP NTs/NF                                               | 232.6                                              | 1 M KOH     | 12        |
| D/CoFe-MOF                                                    | ~275                                               | 1 M KOH     | 13        |
| NiFe-LS                                                       | ~215                                               | 1 M KOH     | 14        |
| S-FeOOH/Co(OH) <sub>2</sub> /NF                               | 252                                                | 1 M KOH     | 15        |
| NiFeMo IOS @ NF                                               | ~225                                               | 1 M KOH     | 16        |
| Ru-SAC/NiFe LDH                                               | ~218                                               | 1 M KOH     | 17        |
| CFP                                                           | 296                                                | 1 M KOH     | 18        |
| Se/Fe-CoP AGs                                                 | 297                                                | 1 M KOH     | 19        |
| Ru-S-NiFe LDH                                                 | ~275                                               | 1 M KOH     | 20        |
| VFe-Ni <sub>12</sub> P <sub>5</sub> @C                        | 251                                                | 1 M KOH     | 21        |

**Table S2.** Comparison of recently reported rare-earth-modified transition-metal (oxy)hydroxide catalysts for OER.

| Catalyst                                                                | Tafel slope<br>(mV dec <sup>-1</sup> ) | Electrolyte | Overpotential (mV)             | Stability (h) | Ref.      |
|-------------------------------------------------------------------------|----------------------------------------|-------------|--------------------------------|---------------|-----------|
| Pr <sub>0.1</sub> -CoP/Fe <sub>2</sub> P                                | 46.9                                   | 1M KOH      | 223 at 100 mA cm <sup>-2</sup> | 500 h         | This work |
| LaFeCoOOH                                                               | 44.1                                   | 1M KOH      | 177 at 10 mA cm <sup>-2</sup>  | 1000 h        | 22        |
| NiSe <sub>2</sub> -Ce <sub>2</sub> (CO <sub>3</sub> ) <sub>2</sub> O    | 86.2                                   | 1M KOH      | 268 at 50 mA cm <sup>-2</sup>  | 120 h         | 23        |
| Er doped CoP                                                            | 70                                     | 1M KOH      | 256 at 10 mA cm <sup>-2</sup>  | 20 h          | 24        |
| NdNi-Co <sub>3</sub> O <sub>4</sub>                                     | 54                                     | 1M KOH      | 269 at 10 mA cm <sup>-2</sup>  | 50 h          | 25        |
| Eu <sub>2</sub> O <sub>3</sub> /Fe <sub>3</sub> O <sub>4</sub> @NCG-900 | 68.3                                   | 1M KOH      | 269 at 10 mA cm <sup>-2</sup>  | 1000 h        | 26        |
| Er <sub>0.4</sub> Fe-MOF/NF                                             | 73                                     | 1M KOH      | 248 at 100 mA cm <sup>-2</sup> | 100 h         | 27        |
| Co/CeO <sub>2</sub> -NCNA@CC                                            | 98                                     | 1M KOH      | 350 at 10 mA cm <sup>-2</sup>  | 380 h         | 28        |
| FeCoNiMoCeHEA/C                                                         | 63.4                                   | 1M KOH      | 260 at 10 mA cm <sup>-2</sup>  | /             | 29        |
| CeO <sub>2</sub> /Ni <sub>3</sub> FeN/Ni <sub>3</sub> Fe-5%NPs          | 52.7                                   | 1M KOH      | 249 at 10 mA cm <sup>-2</sup>  | 24 h          | 10        |
| La-CoMoP                                                                | 86.5                                   | 1M KOH      | 250 at 10 mA cm <sup>-2</sup>  | 24 h          | 30        |

**Table S3.** Quantitative XPS valence-state distributions of Fe, Co, and Pr before and after reaction

| Sample                                       | Co species (%)   |                  | Fe species (%)   |                  | Pr species (%)   |                  |
|----------------------------------------------|------------------|------------------|------------------|------------------|------------------|------------------|
|                                              | Co <sup>2+</sup> | Co <sup>3+</sup> | Fe <sup>2+</sup> | Fe <sup>3+</sup> | Pr <sup>3+</sup> | Pr <sup>4+</sup> |
| CoP/Fe <sub>2</sub> P                        | 40.17            | 28.34            | 20.25            | 46.77            | /                | /                |
| Pr <sub>0.1</sub> -CoP/Fe <sub>2</sub> P     | 37.58            | 25.01            | 33.45            | 29.48            | 40.52            | 49.04            |
| Pr <sub>0.2</sub> -CoP/Fe <sub>2</sub> P     | 43.50            | 28.86            | 39.58            | 34.30            | 45.87            | 40.2             |
| Pr <sub>0.3</sub> -CoP/Fe <sub>2</sub> P     | 38.99            | 21.86            | 26.68            | 20.16            | 33.23            | 57.62            |
| CoP/Fe <sub>2</sub> P-OER                    | 32.93            | 57.33            | 15.51            | 27.49            | /                | /                |
| Pr <sub>0.1</sub> -CoP/Fe <sub>2</sub> P-OER | 32.34            | 51.51            | 15.02            | 26.10            | 35.15            | 53.98            |
| Pr <sub>0.2</sub> -CoP/Fe <sub>2</sub> P-OER | 33.17            | 51.06            | 18.13            | 33.26            | 36.26            | 45.81            |
| Pr <sub>0.3</sub> -CoP/Fe <sub>2</sub> P-OER | 32.41            | 50.77            | 15.53            | 22.19            | 41.90            | 45.36            |

**Table S4.** EXAFS fitting results for Pr foil, Fe foil, FeO, Fe<sub>2</sub>O<sub>3</sub>, and Pr<sub>0.2</sub>-CoP/Fe<sub>2</sub>P after OER at the Fe K-edge and Pr L<sub>3</sub>-edge.

| Sample                         | Shell | Bond length<br>(Å) | Coordination<br>Number | $\sigma^2$ (Å <sup>2</sup> ) | E0 shift<br>(eV) | R-factor |
|--------------------------------|-------|--------------------|------------------------|------------------------------|------------------|----------|
| Fe foil                        | Fe-Fe | 2.46±0.02          | 8*                     | 0.005±0.002                  | -2.4±3.7         | 0.009    |
|                                | Fe-Fe | 2.85±0.02          | 6*                     | 0.005±0.004                  |                  |          |
| FeO                            | Fe-O  | 2.13±0.01          | 6*                     | 0.016±0.002                  | -1.8±0.8         | 0.009    |
|                                | Fe-Fe | 3.08±0.01          | 12*                    | 0.014±0.001                  |                  |          |
| Fe <sub>2</sub> O <sub>3</sub> | Fe-O  | 1.98±0.02          | 6*                     | 0.009±0.003                  | -4.8±1.7         | 0.015    |
|                                | Fe-Fe | 2.92±0.02          | 3*                     | 0.003±0.002                  |                  |          |
|                                | Fe-Fe | 3.36±0.03          | 3*                     | 0.005±0.002                  |                  |          |
|                                | Fe-O  | 3.47±0.04          | 3*                     | 0.013±0.003                  |                  |          |
|                                | Fe-O  | 3.61±0.04          | 3*                     | 0.010±0.005                  |                  |          |
| Pr foil                        | Pr-Pr | 3.32±0.01          | 8*                     | 0.011±0.002                  | -5.6±3.1         | 0.019    |
|                                | Pr-Pr | 3.81±0.02          | 6*                     | 0.013±0.002                  |                  |          |
| sample                         | Fe-O  | 1.98±0.04          | 5.4±0.3                | 0.014±0.004                  | -2.1±2.4         | 0.020    |
|                                | Fe-Fe | 3.02±0.02          | 2.2±0.4                | 0.015±0.004                  |                  |          |
|                                | Fe-Fe | 3.48±0.03          | 3.7±0.5                | 0.008±0.006                  |                  |          |
|                                | Pr-O  | 2.43±0.01          | 4.8±0.7                | 0.012±0.003                  | -6.5±0.9         | 0.018    |
|                                | Pr-O  | 2.61±0.04          | 3.3±1.0                | 0.014±0.002                  |                  |          |
|                                | Pr-Pr | 3.94±0.02          | 3.7±0.9                | 0.009±0.004                  |                  |          |

**Table S5.** ICP results of Pr<sub>0.2</sub>-CoP/Fe<sub>2</sub>P after OER.

| Elements | Molar mass ( $\mu\text{mol}$ ) |
|----------|--------------------------------|
| Fe       | 3.83                           |
| Co       | 3.87                           |
| Pr       | 1.95                           |

**Table S6.** Comparison of the water-splitting performance of our AEMWE with other recently reported water electrolyzer.

| Catalyst                                                                | Performance                 | Conditions                 | Stability                                                             | Ref.      |
|-------------------------------------------------------------------------|-----------------------------|----------------------------|-----------------------------------------------------------------------|-----------|
| Pt/C  Pr <sub>0.2</sub> -CoP/Fe <sub>2</sub> P                          | 1.88 V@1 A cm <sup>-2</sup> | 85°C, 30 wt% KOH           | 400 h<br>@300 mA cm <sup>-2</sup><br>(1 M KOH at 25°C)                | This work |
| FeRu@NM-<br>2  FeRu@NM-2                                                | 2.19 V@1 A cm <sup>-2</sup> | 60°C, 1 M KOH              | 90 h<br>@500 mA cm <sup>-2</sup><br>(1 M KOH at 60°C)                 | 31        |
| CuNi@NiSe  CuNi<br>@NiSe                                                | 2.2 V@1 A cm <sup>-2</sup>  | 80°C, 1 M KOH              | 10 h<br>@1000 mA cm <sup>-2</sup><br>(1 M KOH at 80°C)                | 32        |
| Ru-Co <sub>2</sub> NiNCNT  Ru-<br>Co <sub>2</sub> NiNCNT                | 1.87 V@1 A cm <sup>-2</sup> | 60°C, 1 M KOH              | 400 h<br>@500 mA cm <sup>-2</sup><br>(1 M KOH at 60°C)                | 33        |
| Co <sub>2.8</sub> W <sub>3.8</sub> -NiFe<br>LDH  Pt/C                   | 1.86 V@1 A cm <sup>-2</sup> | 60°C, 1 M KOH              | 300 h<br>@1000 mA cm <sup>-2</sup><br>(1 M KOH at 60°C)               | 34        |
| NiCe <sub>0.05</sub> /Fe@NM  <br>NiCe <sub>0.05</sub> /Fe@NM            | 2.27 V@1 A cm <sup>-2</sup> | 60°C, 5 M KOH              | 70 h<br>@1000 mA cm <sup>-2</sup><br>(5 M KOH at 60°C)                | 1         |
| Ni <sub>3</sub> FeN@PO <sub>4</sub> <sup>3-</sup> /NF  Pt-<br>Ni@MoN/NF | 2.11 V@1A cm <sup>-2</sup>  | 25°C<br>6 M KOH + seawater | 140 h<br>@1000 mA cm <sup>-2</sup><br>(6 M KOH +<br>seawater at 25°C) | 35        |

**Table S7.** ICP analysis of dissolved Fe, Co, and Pr in the electrolyte after 300 h OER testing.

| Sample                                   | Fe (mg/L) | Co (mg/L) | Pr (mg/L) |
|------------------------------------------|-----------|-----------|-----------|
| Pr <sub>0.2</sub> -CoP/Fe <sub>2</sub> P | 0.09      | 0.04      | 0.06      |

## Reference:

- 1 W. Yaseen, M. Xie, B. A. Yusuf, S. C. Meng, I. Khan, J. M. Xie and Y. G. Xu, *Small*, 2024, **20**, 2403971.
- 2 H. W. Tang, Z. Y. Sun, S. Y. Fan, S. W. Feng, L. Li, L. Fang and C. J. Wang, *Chem. Eng. J.*, 2024, **491**, 152023.
- 3 J. W. Li, M. Song, Y. Z. Hu, C. Zhang, W. Liu, X. Huang, J. J. Zhang, Y. Zhu, J. Zhang and D. L. Wang, *Nano Res.*, 2023, **16**, 3658-3664.
- 4 P. C. Ye, K. Q. Fang, H. Y. Wang, Y. H. Wang, H. Huang, C. B. Mo, J. Q. Ning and Y. Hu, *Nat. Commun.*, 2024, **15**, 1012.
- 5 Y. Deng, J. Wang, S. F. Zhang, Z. J. Zhang, J. F. Sun, T. T. Li, J. L. Kang, H. Liu and S. Bai, *Rare Met.*, 2025, **44**, 1053-1066.
- 6 X. H. Xu, K. W. Guo, J. K. Sun, X. Y. Yu, X. Y. Miao, W. B. Lu and L. F. Jiao, *Adv. Funct. Mater.*, 2024, **34**, 2400397.
- 7 X. Zhou, J. Li, G. Y. Zhou, W. R. Huang, Y. C. Zhang, J. Yang, H. Pang, M. Y. Zhang, D. M. Sun, Y. W. Tang and L. Xu, *J. Energy Chem.*, 2024, **93**, 592-600.
- 8 L. X. Su, C. X. Cui, S. N. Zhou, H. Wu, S. K. Zhang and H. Pang, *Nano Energy*, 2025, **140**, 111051.
- 9 F. J. Shi, L. Y. Xiao, Z. L. Zhou, X. R. Zhao, Y. Liu, J. Mao, J. Y. Qin, Y. D. Deng and J. Yang, *Adv. Funct. Mater.*, 2025, **35**, 2501070.
- 10 Q. Y. Liu, X. J. Mu, F. Y. Kang, S. Y. Xie, C. H. Yan and Y. Tang, *Small*, 2024, **20**.
- 11 C. F. Liu, H. Y. Bai, J. X. Feng, K. Y. An, L. Li, Z. C. Yu, L. L. Qiao, D. Liu, S. Y. Peng, H. C. Liu and H. Pan, *Carbon Energy*, 2025, **7**, e684.
- 12 X. Q. Wang, J. H. Zhou, W. G. Cui, F. Gao, Y. Gao, F. L. Qi, Y. X. Liu, X. Y. Yang, K. Wang, Z. L. Li, Y. X. Yang, J. Chen, W. P. Sun, L. X. Sun and H. G. Pan, *Adv. Sci.*, 2024, **11**, 2401207.
- 13 J. Zhou, S. Qiu, X. B. Hou, T. J. Ni, C. H. Zhang, S. X. Dai, X. K. Wang, G. H. Wang, H. Q. Jiang and M. H. Huang, *Angew. Chem. Int. Ed.*, 2025, **64**, e202503787.

- 14 Y. H. Wang, S. Q. Li, X. Hou, T. T. Cui, Z. C. Zhuang, Y. H. Zhao, H. Z. Wang, W. Wei, M. Xu, Q. Fu, C. X. Chen and D. S. Wang, *Adv. Mater.*, 2024, **36**, 2412598.
- 15 Y. J. Zhang, W. Y. Zhang, X. W. Zhang, Y. Gao, Q. Zhao, J. P. Li and G. Liu, *Small*, 2024, **20**, 2405080.
- 16 C. T. Hsieh, C. L. Huang, Y. A. Chen and S. Y. Lu, *Appl. Catal. B Environ.*, 2020, **267**, 118376.
- 17 M. Israr, S. Ali, J. Q. Zhang, Y. Zeng, M. Humayun, H. Yu, X. Chen, C. Chen and Y. D. Li, *Small*, 2025, **21**, 2500828.
- 18 F. Zhang, K. Wang, H. Zhang, S. L. Yang, M. Xu, Y. He, L. C. Lei, P. F. Xie and X. W. Zhang, *Adv. Funct. Mater.*, 2025, **35**, 2500861.
- 19 T. Wang, X. Y. Liao, T. Zhang, M. L. Dai and H. Lin, *Compos. Part B-Eng.*, 2023, **254**, 110601.
- 20 Y. M. Zhu, J. A. Wang, G. Weiser, M. Klingenhof, T. Koketsu, S. H. Liu, Y. C. Pi, G. Henkelman, X. Y. Shi, J. Y. Li, C. W. Pao, M. H. Yeh, W. H. Huang, P. Strasser and J. W. Ma, *Adv. Energy Mater.*, 2025, **15**, 2500554.
- 21 G. C. Li, Y. L. Li, J. Dong, B. X. Sun, Z. L. Liu, J. Zheng and G. L. Li, *Adv. Funct. Mater.*, 2025, DOI: 10.1002/adfm.202515680, e15680.
- 22 L. Gao, Y. Yao, Y. H. Ma, J. J. Huang, Y. Chen, L. Chen and L. S. Jia, *Adv. Funct. Mater.*, 2025, **35**.
- 23 F. L. Wei, J. H. Shen, J. Y. Xie, Z. Y. Luo, L. Y. Shi, T. T. Isimjan, X. L. Yang, J. S. Qiu and B. Wu, *J. Energy Chem.*, 2024, **98**, 472-480.
- 24 G. Zhang, B. Wang, J. Bi, D. Fang and S. Yang, *J. Mater. Chem. A*, 2019, **7**, 5769-5778.
- 25 T. Li, Z. Wang, L. Wang, M. Wang and Y.-Q. Liu, *Appl. Catal. B Environ.*, 2024, **352**, 123990.
- 26 C. Chen, J. Long, K. Shen, X. Liu and W. Zhang, *ACS Appl. Mater. Interfaces*, 2022, **14**, 38677-38688.
- 27 Y. Ma, Y. J. Miao, G. M. Mu, D. M. Lin, C. G. Xu, W. Zeng and F. Y. Xie, *Nanomaterials*, 2021, **11**.

- 28 S. Li, H. Zhang, L. Wu, H. Zhao, L. Li, C. Sun and B. An, *J. Mater. Chem. A*, 2022, **10**, 9858-9868.
- 29 W. Y. Zhang, R. H. Guo, Q. X. Yue, Y. R. Huang, G. F. Zhang and L. L. Guan, *Ionics*, 2024, **30**, 3403-3416.
- 30 L. Li, K. Chao, X. W. Liu and S. Y. Zhou, *J. Alloys Compd.*, 2023, **941**.
- 31 J. Y. Zhang, M. Y. Yang, T. Huang, J. W. Sun, W. Y. Hu, Y. Y. Li, F. Y. Yang and M. G. Ouyang, *Chem. Eng. J.*, 2024, **493**, 152547.
- 32 D. Cao, J. Shao, Y. H. Cui, L. P. Zhang and D. J. Cheng, *Small*, 2023, **19**, 2301613.
- 33 A. Majumdar, K. D. Tran, S. Prabhakaran, D. Kim, D. T. Tran, N. H. Kim and J. H. Lee, *Adv. Funct. Mater.*, 2025, **35**, 2420517.
- 34 Y. Shi, L. Song, Y. Liu, T. Wang, C. Li, J. Lai and L. Wang, *Adv. Energy Mater.*, 2024, **14**, 2402046.
- 35 H. S. Hu, X. L. Wang, Z. R. Zhang, J. H. Liu, X. H. Yan, X. L. Wang, J. C. Wang, J. P. Attfield and M. H. Yang, *Adv. Mater.*, 2025, **37**, 2415421.
